# Supplementary material for: How Perceived Adequacy of Open Public Space Is Related to Objective Green Space and Individuals’ Opinions of Area-Level Quality
Source: MDPI journal article supplement (doi:10.3390/su13158516), 2021-07-30
Supplement: s1 [file s1]

Archive with 1 entries (1 files):
- sustainability-1244371-supplementary.pdf
