# Supplementary material for: How Perceived Adequacy of Open Public Space Is Related to Objective Green Space and Individuals’ Opinions of Area-Level Quality
Source: MDPI journal article supplement (doi:10.3390/su13158516), 2021-07-30
Supplement: s1 [file s1 › sustainability-1244371-supplementary.pdf]

# Supplementary file for “How Perceived Adequacy of Open Public Space is Related to Objective Green Space and Individuals' Opinions of Area-level Quality”

## 1. Additional descriptive statistics

**Table S1.** Average perceived problems with open space by category of the other variables used in the paper.

|                                                     | Perceived problems with lack of open public space |             |
|-----------------------------------------------------|---------------------------------------------------|-------------|
| Sample categories                                   | No problem (%)                                    | Problem (%) |
| <b>Objective green space</b>                        |                                                   |             |
| Non-urban                                           | 91.35                                             | 8.65        |
| Green space quintile 1<br>(Least urban green space) | 82.67                                             | 17.33       |
| Green space quintile 2                              | 90.21                                             | 9.79        |
| Green space quintile 3                              | 90.39                                             | 9.61        |
| Green space quintile 4                              | 91.75                                             | 8.25        |
| Green space quintile 5<br>(Most green space)        | 88.25                                             | 11.75       |
|                                                     |                                                   |             |
| <b>Area-level deprivation</b>                       |                                                   |             |
| Deprivation quintile 1<br>(Most deprived)           | 86.68                                             | 13.32       |
| Deprivation quintile 2                              | 90.85                                             | 9.15        |
| Deprivation quintile 3                              | 91.75                                             | 8.25        |
| Deprivation quintile 4                              | 91.42                                             | 8.58        |
| Deprivation quintile 5<br>(Most affluent)           | 92.28                                             | 7.72        |
|                                                     |                                                   |             |
| <b>Age</b>                                          |                                                   |             |
| 16-24                                               | 85.93                                             | 14.07       |
| 25-44                                               | 87.16                                             | 12.84       |
| 45-64                                               | 92.13                                             | 7.87        |
| 65 or over                                          | 94.93                                             | 5.07        |
|                                                     |                                                   |             |
| <b>Gender</b>                                       |                                                   |             |
| Female                                              | 90.63                                             | 9.37        |
| Male                                                | 90.83                                             | 9.17        |
|                                                     |                                                   |             |
| <b>Marital status</b>                               |                                                   |             |
| Not married                                         | 90.22                                             | 9.78        |
| Married                                             | 91.17                                             | 8.83        |
|                                                     |                                                   |             |
| <b>Region</b>                                       |                                                   |             |
| Dublin                                              | 90.12                                             | 9.88        |
| Rest of Leinster                                    | 88.43                                             | 11.57       |
| Munster                                             | 90.39                                             | 9.61        |
| Connaught/Ulster                                    | 94.24                                             | 5.76        |

|                                            | Perceived problems with lack of open public space |             |
|--------------------------------------------|---------------------------------------------------|-------------|
| Sample categories                          | No problem (%)                                    | Problem (%) |
|                                            |                                                   |             |
| <b>Area level rubbish</b>                  |                                                   |             |
| No problem                                 | 94.41                                             | 5.59        |
| A bit of a problem                         | 82.90                                             | 17.1        |
| A big problem                              | 72.93                                             | 27.07       |
|                                            |                                                   |             |
| <b>Area level graffiti</b>                 |                                                   |             |
| No problem                                 | 92.62                                             | 7.38        |
| A bit of a problem                         | 78.63                                             | 21.37       |
| A big problem                              | 57.67                                             | 42.33       |
|                                            |                                                   |             |
| <b>Area level vandalism</b>                |                                                   |             |
| No problem                                 | 93.13                                             | 6.87        |
| A bit of a problem                         | 79.85                                             | 20.15       |
| A big problem                              | 51.69                                             | 48.31       |
|                                            |                                                   |             |
| <b>Area level racism</b>                   |                                                   |             |
| No problem                                 | 92.29                                             | 7.71        |
| A bit of a problem                         | 68.77                                             | 31.23       |
| A big problem                              | 38.14                                             | 61.86       |
|                                            |                                                   |             |
| <b>Area level break-ins</b>                |                                                   |             |
| No problem                                 | 93.72                                             | 6.28        |
| A bit of a problem                         | 86.48                                             | 13.52       |
| A big problem                              | 79.14                                             | 20.86       |
|                                            |                                                   |             |
| <b>Area-level people being drunk</b>       |                                                   |             |
| No problem                                 | 94.05                                             | 5.95        |
| A bit of a problem                         | 70.06                                             | 29.94       |
| A big problem                              | 35.00                                             | 65.00       |
|                                            |                                                   |             |
| <b>Area level public transport problem</b> |                                                   |             |
| No problem                                 | 93.72                                             | 6.28        |
| A bit of a problem                         | 87.31                                             | 12.69       |
| A big problem                              | 82.91                                             | 17.09       |
|                                            |                                                   |             |
| <b>Area level food shop shortage</b>       |                                                   |             |
| No problem                                 | 92.71                                             | 7.29        |
| A bit of a problem                         | 84.01                                             | 15.99       |
| A big problem                              | 72.92                                             | 27.08       |
|                                            |                                                   |             |
| <b>Education level</b>                     |                                                   |             |
| Primary                                    | 92.96                                             | 7.04        |
| Secondary                                  | 91.35                                             | 8.65        |
| Tertiary                                   | 89.38                                             | 10.62       |

|                            | Perceived problems with lack of open public space |             |
|----------------------------|---------------------------------------------------|-------------|
| Sample categories          | No problem (%)                                    | Problem (%) |
|                            |                                                   |             |
| <b>Medical card status</b> |                                                   |             |
| No medical card            | 90.95                                             | 9.05        |
| GP visit card              | 91.91                                             | 8.09        |
| Full medical card          | 90.23                                             | 9.77        |
|                            |                                                   |             |
| <b>Immigrant status</b>    |                                                   |             |
| Non-immigrant              | 91.03                                             | 8.97        |
| Immigrant                  | 89.10                                             | 10.90       |
| <b>N</b>                   | 7,347                                             | 7,347       |

## 2. Summary statistics from variables generated by Principal Components Analysis

**Table S2.** Summary statistics for area-level quality proxy variables.

| Variable          | Mean | Standard deviation |
|-------------------|------|--------------------|
| Safety            | 0    | 1.27               |
| Cleanliness       | 0    | 1.42               |
| Service provision | 0    | 1.22               |

## 3. Full regression results

**Table S3.** Full regression results for models in Table 4 (OR = odds ratios and SE = robust standard errors).

|                                | Basic model |       | Model with social controls |       | Model with all controls |       |
|--------------------------------|-------------|-------|----------------------------|-------|-------------------------|-------|
| Model                          | (1)         |       | (2)                        |       | (3)                     |       |
|                                | OR          | SE    | OR                         | SE    | OR                      | SE    |
| <b>Green space category</b>    |             |       |                            |       |                         |       |
| Quintile 1 (Least green space) | [REF]       |       | [REF]                      |       | [REF]                   |       |
| Quintile 2                     | 0.57**      | 0.126 | 0.51***                    | 0.113 | 0.71                    | 0.177 |
| Quintile 3                     | 0.57**      | 0.124 | 0.46***                    | 0.103 | 0.42***                 | 0.107 |
| Quintile 4                     | 0.44***     | 0.1   | 0.36***                    | 0.082 | 0.31***                 | 0.082 |
| Quintile 5                     | 0.65**      | 0.143 | 0.58**                     | 0.131 | 0.48***                 | 0.124 |
| Non-urban                      | 0.5***      | 0.083 | 0.3***                     | 0.066 | 0.28***                 | 0.069 |
|                                |             |       |                            |       |                         |       |
| <b>Age</b>                     |             |       |                            |       |                         |       |
| 16-24                          | 1.09        | 0.146 | 1.19                       | 0.174 | 0.88                    | 0.147 |
| 25-44                          | [REF]       |       | [REF]                      |       | [REF]                   |       |
| 45-64                          | 0.59***     | 0.058 | 0.62***                    | 0.064 | 0.6***                  | 0.067 |
| 65+                            | 0.37***     | 0.045 | 0.36***                    | 0.053 | 0.41***                 | 0.064 |
|                                |             |       |                            |       |                         |       |
| <b>Sex</b>                     |             |       |                            |       |                         |       |
| Female                         | [REF]       |       | [REF]                      |       | [REF]                   |       |
| Male                           | 0.99        | 0.081 | 1.02                       | 0.087 | 1.04                    | 0.096 |

|                                                      | Basic model |       | Model with social controls |       | Model with all controls |       |
|------------------------------------------------------|-------------|-------|----------------------------|-------|-------------------------|-------|
| Model                                                | (1)         |       | (2)                        |       | (3)                     |       |
|                                                      | OR          | SE    | OR                         | SE    | OR                      | SE    |
| <b>Deprivation category</b>                          |             |       |                            |       |                         |       |
| Quintile 1 (Least affluent)                          |             |       | 1.93***                    | 0.288 | 1.17                    | 0.196 |
| Quintile 2                                           |             |       | 1.6***                     | 0.243 | 1.12                    | 0.183 |
| Quintile 3                                           |             |       | 1.31*                      | 0.204 | 0.87                    | 0.152 |
| Quintile 4                                           |             |       | 1.39**                     | 0.209 | 1.16                    | 0.186 |
| Quintile 5 (Most affluent)                           |             |       | [REF]                      |       | [REF]                   |       |
| <b>Highest level of education</b>                    |             |       |                            |       |                         |       |
| Primary                                              |             |       | 1.03                       | 0.167 | 0.99                    | 0.18  |
| Secondary                                            |             |       | [REF]                      |       | [REF]                   |       |
| Tertiary                                             |             |       | 1.37***                    | 0.132 | 1.25**                  | 0.13  |
| <b>Marital status</b>                                |             |       |                            |       |                         |       |
| Married                                              |             |       | 1.07                       | 0.095 | 1.03                    | 0.104 |
| Non-married <sup>1</sup>                             |             |       | [REF]                      |       | [REF]                   |       |
| <b>Employment status</b>                             |             |       |                            |       |                         |       |
| Unemployed                                           |             |       | 1.05                       | 0.185 | 0.83                    | 0.167 |
| Employed                                             |             |       | [REF]                      |       | [REF]                   |       |
| <b>Smoker</b>                                        |             |       |                            |       |                         |       |
| Yes                                                  |             |       | 0.98                       | 0.107 | 0.93                    | 0.116 |
| No                                                   |             |       | [REF]                      |       | [REF]                   |       |
| <b>Private health insurance</b>                      |             |       |                            |       |                         |       |
| Yes                                                  |             |       | 0.84*                      | 0.086 | 0.89                    | 0.099 |
| No                                                   |             |       | [REF]                      |       | [REF]                   |       |
| <b>Medical card status</b>                           |             |       |                            |       |                         |       |
| No medical card                                      |             |       | [REF]                      |       | [REF]                   |       |
| GP visit card holder                                 |             |       | 1.09                       | 0.211 | 1.08                    | 0.233 |
| Medical card holder                                  |             |       | 1.35***                    | 0.15  | 1.27*                   | 0.152 |
| <b>Region</b>                                        |             |       |                            |       |                         |       |
| Dublin                                               |             |       | 0.66**                     | 0.107 | 0.42***                 | 0.077 |
| Rural Leinster                                       |             |       | 1.28**                     | 0.146 | 1.27*                   | 0.156 |
| Munster                                              |             |       | [REF]                      |       | [REF]                   |       |
| Connaught-Ulster                                     |             |       | 0.59***                    | 0.078 | 0.62***                 | 0.09  |
| <b>Area quality proxy variables</b>                  |             |       |                            |       | 0***                    | 0     |
| Safety                                               |             |       |                            |       | 0.87***                 | 0.031 |
| Cleanliness                                          |             |       |                            |       | 0.64***                 | 0.023 |
| Service provision                                    |             |       |                            |       | 0.69***                 | 0.022 |
| <b>Constant</b>                                      | 0.28***     | 0.045 | 0.24***                    | 0.063 | 0.31***                 | 0.085 |
| Note: * $p < 0.05$ , ** $p < 0.01$ , *** $p < 0.001$ |             |       |                            |       |                         |       |

<sup>1</sup> The reference category includes single, divorced, separated and widowed.

#### 4. Additional regressions run as checks of robustness

**Table S4.** Marginal effects from models with the green space reference category switched to the highest urban green space quintile.

|                                                                                  | Basic model        | Model with social controls | Model with all controls |
|----------------------------------------------------------------------------------|--------------------|----------------------------|-------------------------|
| Model                                                                            | (4)                | (5)                        | (6)                     |
| <b>Reference category: Areas with top quintile of green space in urban areas</b> |                    |                            |                         |
| Green space quintile 1 (Least green space)                                       | 0.049*<br>(0.025)  | 0.076**<br>(0.033)         | 0.079***<br>(0.029)     |
| Green space quintile 2                                                           | -0.012<br>(0.020)  | -0.014<br>(0.025)          | 0.038<br>(0.026)        |
| Green space quintile 3                                                           | -0.012<br>(0.020)  | -0.023<br>(0.024)          | -0.012<br>(0.021)       |
| Green space quintile 4                                                           | -0.032*<br>(0.019) | -0.047**<br>(0.023)        | -0.033*<br>(0.020)      |
| Green space quintile 5 (Most green space)                                        | [REF]              | [REF]                      | [REF]                   |
| Non-Urban                                                                        | -0.022<br>(0.016)  | -0.061***<br>(0.021)       | -0.040**<br>(0.018)     |
| Age and sex variables                                                            | Yes                | Yes                        | Yes                     |
| Demographic variables                                                            |                    | Yes                        | Yes                     |
| Area variables                                                                   |                    |                            | Yes                     |

**Table S5.** Marginal effects for green space variables in two alternative models.

|                                            | Full model estimated with OLS | Full model with only urban observations |
|--------------------------------------------|-------------------------------|-----------------------------------------|
| Model                                      | (7)                           | (8)                                     |
| Green space quintile 1 (Least green space) | [REF]                         | [REF]                                   |
| Green space quintile 2                     | -0.035<br>(0.023)             | -0.056**<br>(0.025)                     |
| Green space quintile 3                     | -0.067***<br>(0.022)          | -0.094***<br>(0.023)                    |
| Green space quintile 4                     | -0.087***<br>(0.022)          | -0.111***<br>(0.022)                    |
| Green space quintile 5                     | -0.059***<br>(0.023)          | -0.092***<br>(0.024)                    |
| Non-urban                                  | -0.100***<br>(0.023)          |                                         |
| Demographic variables                      | Yes                           | Yes                                     |
| Area variables                             | Yes                           | Yes                                     |
| N                                          | 7,347                         | 2,189                                   |
| R <sup>2</sup>                             | 0.17                          |                                         |
